# Supplementary material for: Stored Reference Samples Enable Efficient Non-Target HRMS Screening for Novel Chemical Contamination in Drinking Water
Source: MDPI journal article supplement (doi:10.3390/w14162586), 2022-08-22
Supplement: s1 [file s1]

Archive with 1 entries (1 files):
- water-1838790-supplementary.pdf
